# Supplementary material
Source: MDPI journal article supplement (https://www.mdpi.com/2073-4395/10/12/2002)
Supplement: s1 [file s1]

**Table S1.** Calibration equations for each date of sample collection in 2019 and band for digital number conversion to ln reflectance.

| Day after Planting (DAP) | Band 1 <sup>a</sup>     | Band 2 <sup>a</sup>     | Band 3 <sup>a</sup>     |
|--------------------------|-------------------------|-------------------------|-------------------------|
| 06-07 (22)               | $y = -0.0163x + 4.9117$ | $y = -0.0166x + 5.0490$ | $y = -0.0172x + 5.2591$ |
| 06-14 (29)               | $y = -0.0169x + 4.1094$ | $y = -0.0165x + 4.2062$ | $y = -0.0163x + 4.3436$ |
| 06-25 (40)               | $y = -0.0169x + 4.7826$ | $y = -0.0173x + 5.0625$ | $y = -0.0181x + 5.3184$ |
| 07-02 (47)               | $y = -0.0151x + 4.4368$ | $y = -0.0152x + 4.6308$ | $y = -0.0156x + 4.7909$ |
| 07-11 (56)               | $y = -0.0161x + 4.7722$ | $y = -0.0162x + 4.8563$ | $y = -0.0167x + 5.0842$ |
| 07-18 (63)               | $y = -0.0188x + 5.8016$ | $y = -0.0187x + 5.7713$ | $y = -0.0191x + 5.9523$ |
| 07-25 (70)               | $y = -0.0180x + 5.4610$ | $y = -0.0181x + 5.5604$ | $y = -0.0183x + 5.6615$ |
| 07-31 (75)               | $y = -0.0179x + 5.4756$ | $y = -0.0178x + 5.4708$ | $y = -0.0180x + 5.5429$ |
| 08-06 (82)               | $y = -0.0205x + 6.2682$ | $y = -0.0200x + 6.1831$ | $y = -0.0204x + 6.3366$ |
| 08-14 (90)               | $y = -0.0196x + 5.9732$ | $y = -0.0196x + 6.0580$ | $y = -0.0192x + 6.0268$ |
| 08-22 (98)               | $y = -0.0200x + 6.1518$ | $y = -0.0197x + 6.0740$ | $y = -0.0197x + 6.1333$ |
| 09-02 (108)              | $y = -0.0194x + 5.9197$ | $y = -0.0192x + 5.9224$ | $y = -0.0195x + 6.0587$ |
| 09-13 (120)              | $y = -0.0158x + 4.1944$ | $y = -0.0158x + 4.2840$ | $y = -0.0160x + 4.4268$ |
| 09-23 (130)              | $y = -0.0161x + 4.9565$ | $y = -0.0163x + 5.0610$ | $y = -0.0170x + 5.3023$ |

<sup>a</sup> Calibration equation derived from the linear line of best fit of the negative natural log transformed measured reflectance values and collected average digital number of the calibration targets for the specific band of the collected imagery.

**Table S2.** ANOVA results of all collected variables and the effect of day after planting (DAP), treatment, and their combination from the field experiment in 2019 in Iowa.

| Variable <sup>a</sup> | DAP    | Treatment | DAP * Treatment |
|-----------------------|--------|-----------|-----------------|
| FLS                   | <0.001 | NS        | 0.045           |
| DM                    | <0.001 | NS        | NS              |
| TLAI                  | <0.001 | NS        | NS              |
| GLAI <sub>Dx</sub>    | <0.001 | NS        | NS              |
| Canopy cover          | <0.001 | 0.110     | 0.025           |
| NDVI                  | <0.001 | NS        | NS              |
| Yield                 | ---    | <0.001    | ---             |

<sup>a</sup> FLS = frog eye leaf spot, DM = dry matter, TLAI = total leaf area index, GLAI<sub>Dx</sub> = green leaf area index with frog eye leaf spot severity removed, NDVI = Normalized Difference Vegetation Index.
